# Supplementary material for: Relaxation processes in a single crystal of Co(NCS)2(4-methoxypyridine)2 spin chain
Source: Royal Society of Chemistry journal article supplement (doi:10.1039/d2cp03415h), 2022-01-01
Supplement: d2cp03415h1.pdf [file d2cp03415h1.pdf]

## Electronic Supplementary Information

### Relaxation processes in a single crystal of $\text{Co}(\text{NCS})_2(4\text{-methoxypyridine})_2$ spin chain

Magdalena Foltyn<sup>a\*</sup>, Dawid Pinkowicz<sup>b</sup>, Christian Näther<sup>c</sup>, Michał Rams<sup>a</sup>

<sup>a</sup> *Institute of Physics, Jagiellonian University, Łojasiewicza 11, 30348 Kraków, Poland. E-mail: magdalena.foltyn@uj.edu.pl;*

<sup>b</sup> *Faculty of Chemistry, Jagiellonian University, Gronostajowa 2, 30-387 Kraków, Poland;*

<sup>c</sup> *Institut für Anorganische Chemie, Christian-Albrechts-Universität zu Kiel, Max-Eyth-Straße 2, 24118 Kiel, Germany;*

**1-sc** – single crystal sample of  $[\text{Co}(\text{NCS})_2(4\text{-methoxypyridine})_2]_n$

**1-p** – previously investigated powder sample of  $[\text{Co}(\text{NCS})_2(4\text{-methoxypyridine})_2]_n$

**1-g1** – powder sample of  $[\text{Co}(\text{NCS})_2(4\text{-methoxypyridine})_2]_n$  obtained by grounding crystals

**1-g2** – powder sample of  $[\text{Co}(\text{NCS})_2(4\text{-methoxypyridine})_2]_n$  obtained by grounding crystals twice

### Synthesis and Crystallographic studies

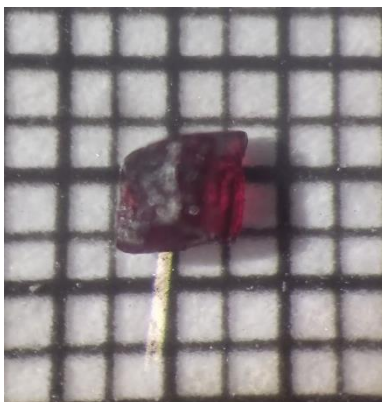

Figure S1. A photo of the single crystal of **1-sc** that was used for magnetic investigations. The smallest grid is 0.5 mm.

Tab. S1. Selected crystallographic data for **1-sc**.

| <i>Space group</i> | $P\bar{1}$ |
|--------------------|------------|
| $a$ [Å]            | 8.9577(5)  |
| $b$ [Å]            | 10.3859(7) |
| $c$ [Å]            | 10.8543(7) |
| $\alpha$ [°]       | 66.188(2)  |
| $\beta$ [°]        | 67.991(2)  |
| $\gamma$ [°]       | 82.987(2)  |
| $Z$                | 2          |
| $T$ [K]            | 296        |

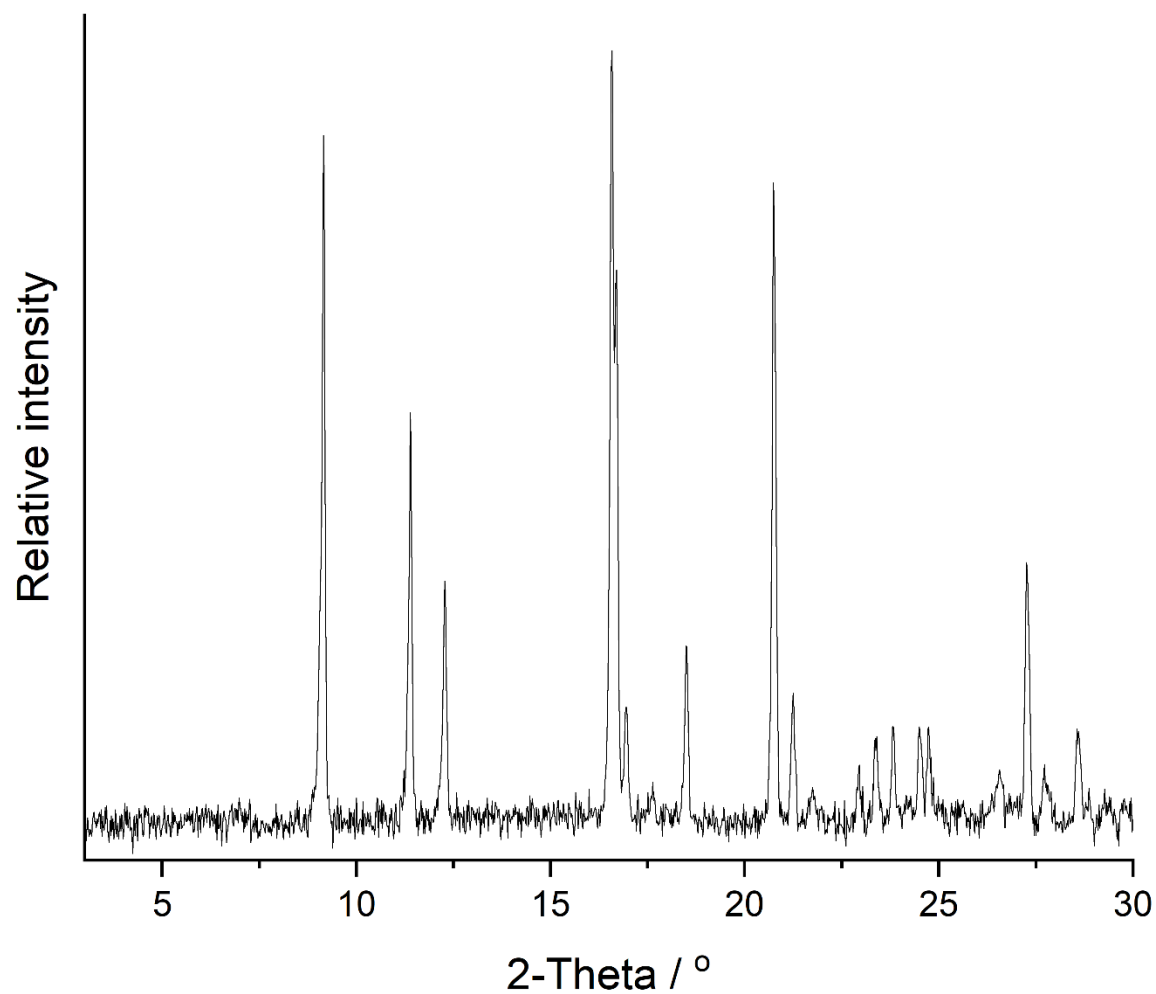

Figure S2. Experimental PXRD pattern for **1-sc**. The pattern is the same as the experimental and theoretical patterns published in <sup>1</sup> (Fig. S2 in <sup>1</sup>, patterns A and B, Supporting Information). No other phases are present, confirming the purity of the sample.

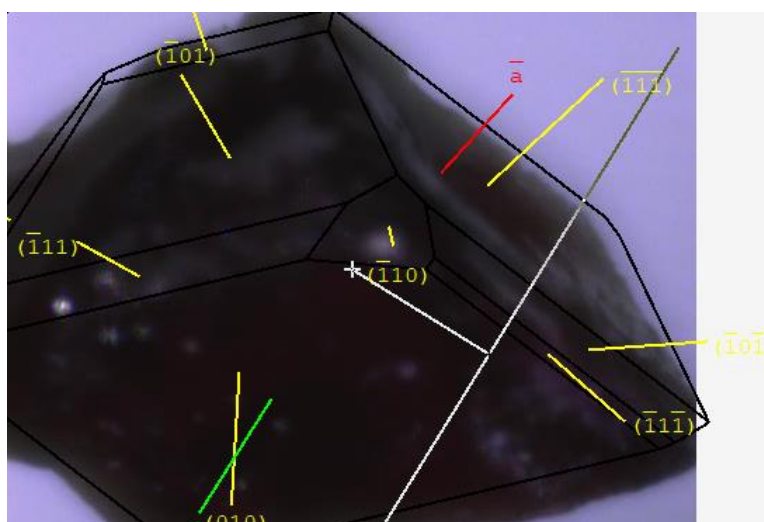

Figure S3. The photo of the single crystal of **1**, with the faces indexed.

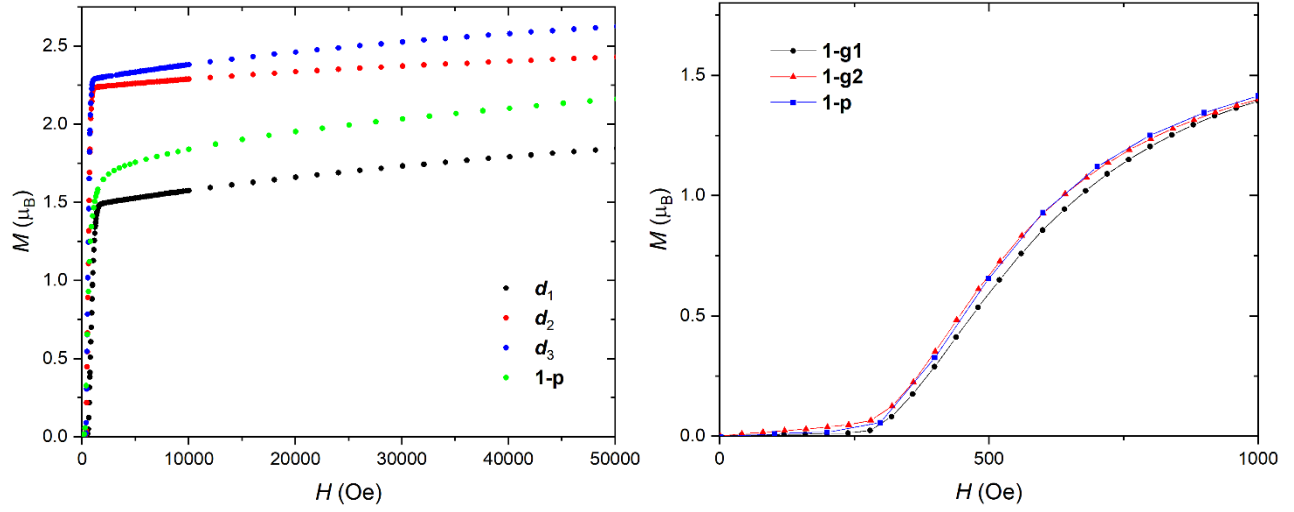

Figure S4. Left: Magnetization curves measured along 3 perpendicular directions of a single crystal sample, **1-sc**, at 1.8 K presented up to 50 kOe. Right: The magnetization curves for powder samples. Blue points: data already published in <sup>1</sup>.

#### Experimental determination of the direction of the easy axis

$\mathbf{d}_1$  is  $\perp$  to the (010) plane,  $\mathbf{d}_2 = [100]$ ,  $\mathbf{d}_3 = \mathbf{d}_1 \times \mathbf{d}_2$ . Vectors  $\mathbf{d}_1, \mathbf{d}_2, \mathbf{d}_3$  are normalized to 1.

The experimental magnetization easy axis,  $\mathbf{M}_{ea}$ , was calculated by solving 3 equations of projections of  $\mathbf{M}_{ea}$  on the directions of the measurement:

$$M_1 = |\mathbf{M}_{ea} \cdot \mathbf{d}_1| \quad M_2 = |\mathbf{M}_{ea} \cdot \mathbf{d}_2| \quad M_3 = |\mathbf{M}_{ea} \cdot \mathbf{d}_3|$$

The results are:  $\mathbf{M}_{ea} = (2.22, -0.44, 2.65) \mu_B$ .

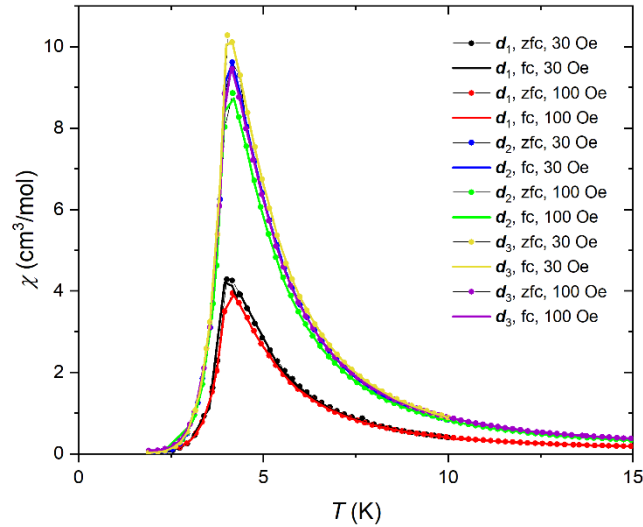

Figure S5. Zero-field cooled and field cooled susceptibility measured for **1-sc** along 3 perpendicular directions of a single crystal sample at 30 and 100 Oe.

## Equations used to simultaneously fit magnetic susceptibility measured along 3 perpendicular directions of single crystal sample of 1

Coordinate system  $(x, y, z)$  corresponds to the main axes of susceptibility tensor that is diagonal in this system. The  $z$  direction is the easy axis direction of magnetization. The measurements were done in 3 perpendicular directions denoted as  $(\mathbf{d}_1, \mathbf{d}_2, \mathbf{d}_3)$ , that create another coordinate system. The rotation matrix  $\mathbf{R}$  between these two systems can be parametrized by proper Euler angles  $(\alpha_1, \alpha_2, \alpha_3)$

$$\mathbf{R} = \begin{pmatrix} \cos \alpha_1 \cos \alpha_3 - \cos \alpha_2 \sin \alpha_1 \sin \alpha_3 & -\cos \alpha_1 \sin \alpha_3 - \cos \alpha_2 \cos \alpha_3 \sin \alpha_1 & \sin \alpha_1 \sin \alpha_2 \\ \cos \alpha_3 \sin \alpha_1 + \cos \alpha_1 \cos \alpha_2 \sin \alpha_3 & \cos \alpha_1 \cos \alpha_2 \cos \alpha_3 - \sin \alpha_1 \sin \alpha_3 & -\cos \alpha_1 \sin \alpha_2 \\ \sin \alpha_2 \sin \alpha_3 & \cos \alpha_3 \sin \alpha_2 & \cos \alpha_2 \end{pmatrix}$$

The magnetization in the ordered state ( $M_x = 0, M_y = 0, M_z = M_{ea}$ ) transforms as

$$\begin{pmatrix} M_1 \\ M_2 \\ M_3 \end{pmatrix} = \mathbf{R} \begin{pmatrix} 0 \\ 0 \\ M_{ea} \end{pmatrix}$$

Using experimental values of  $(M_1, M_2, M_3)$  it is possible to calculate the angles  $\alpha_1$  and  $\alpha_2$ .

$$\tan \alpha_1 = -M_1/M_2$$

$$\tan \alpha_2 = \sqrt{M_{ea}^2 - M_3^2}/M_3$$

The angle  $\alpha_3$  that determines the rotation of  $(x, y)$  axes around  $z$  axis cannot be determined using only data in the ordered phase, therefore  $\alpha_3$  remains a free parameter during fitting the susceptibility in the paramagnetic state. Magnetic susceptibility tensor

$$\chi_{xyz} = \begin{pmatrix} \chi_{xx} & 0 & 0 \\ 0 & \chi_{yy} & 0 \\ 0 & 0 & \chi_{zz} \end{pmatrix},$$

which is a second order tensor, transforms as

$$\chi_{123} = \mathbf{R} \cdot \chi_{xyz} \cdot \mathbf{R}^T$$

and the diagonal elements of  $\chi_{123}$  are the susceptibilities measured in  $\mathbf{d}_1, \mathbf{d}_2, \mathbf{d}_3$  directions.

---

The magnetic susceptibility tensor ( $\chi_{xx}, \chi_{yy}, \chi_{zz}$ ) was modeled using the Hamiltonian for Ising chain of spin  $s = 1/2$  ( $\mathbf{H}$  - magnetic field,  $J$  - intrachain interaction,  $\hat{g}$  -  $g$  factor tensor):

$$\mathcal{H} = -J \sum_j s_j^z s_{j+1}^z + \mu_B \sum_j \mathbf{H} \cdot \hat{g} \cdot \mathbf{s}_j$$

The equations for magnetic susceptibility along  $x, y, z$  derived by Fischer<sup>2</sup>:

$$\chi_{xx}^{chain} = \frac{N_A \mu_B^2 g_x^2}{2J} \left[ \tanh\left(\frac{J}{4k_B T}\right) + \frac{J}{4k_B T} \operatorname{sech}^2\left(\frac{J}{k_B T}\right) \right]$$

$$\chi_{yy}^{chain} = \frac{N_A \mu_B^2 g_y^2}{2J} \left[ \tanh\left(\frac{J}{4k_B T}\right) + \frac{J}{4k_B T} \operatorname{sech}^2\left(\frac{J}{k_B T}\right) \right]$$

$$\chi_{zz}^{chain} = \frac{N_A \mu_B^2 g_z^2}{4k_B T} \exp\left(\frac{J}{2k_B T}\right)$$

Taking into account the interchain interaction,  $zJ'$ , within the mean field approximation<sup>3</sup> ( $\chi_0$  – temperature independent susceptibility):

$$\chi_{ii} = \frac{\chi_{ii}^{chain}}{1 - \chi_{ii}^{chain} \frac{zJ'}{N_A g_i^2 \mu_B^2}} + \chi_0$$

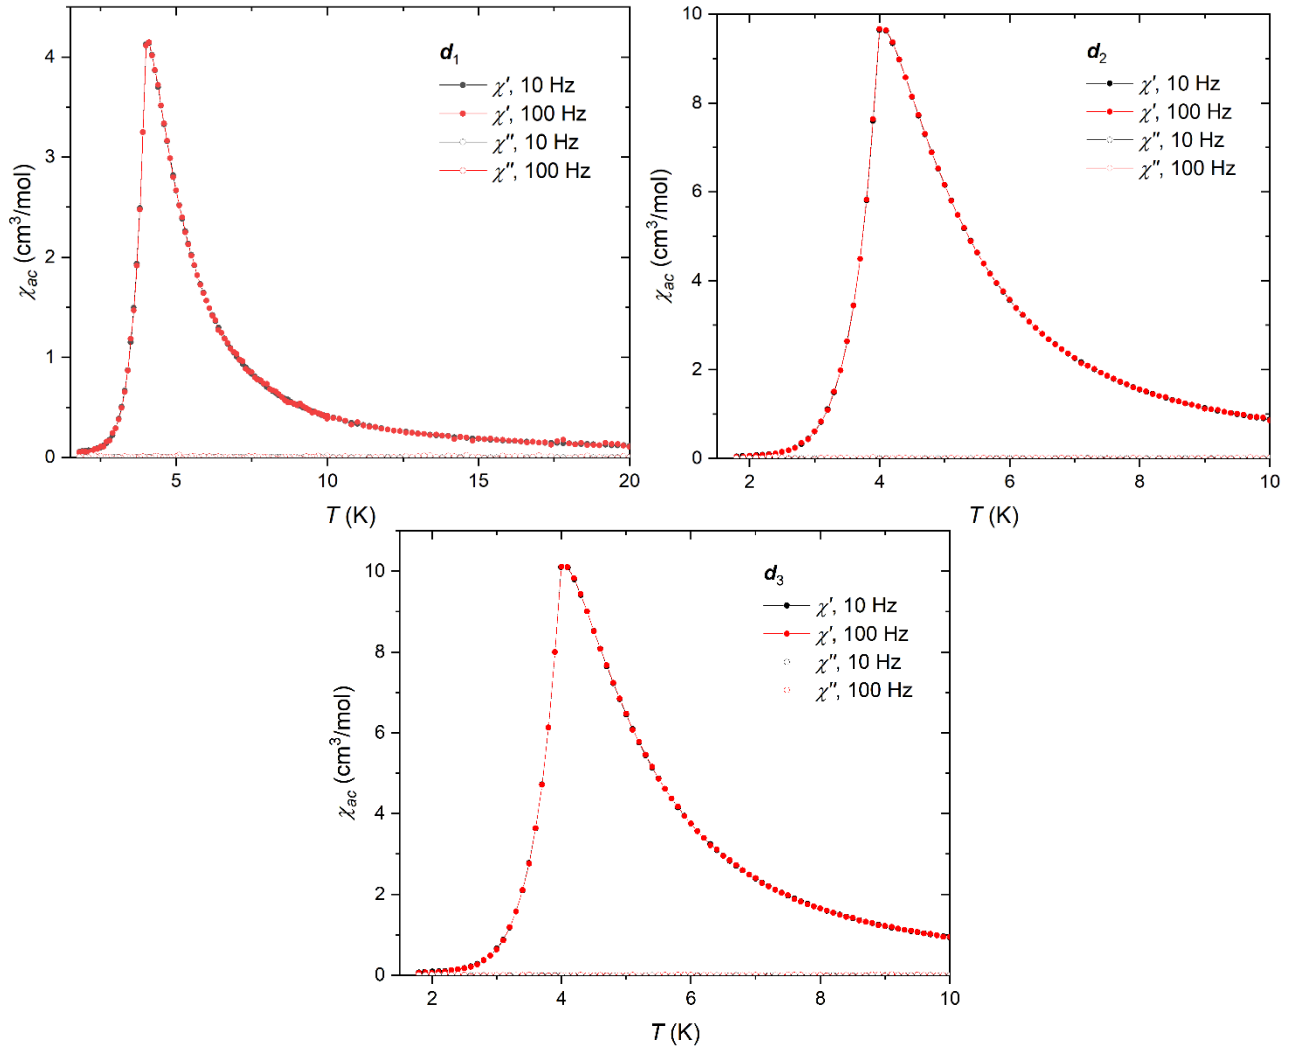

Figure S6. Ac magnetic susceptibility measured for **1-sc** at  $H_{dc} = 0$  Oe,  $H_{ac} = 3$  Oe along 3 perpendicular, crystallographic directions. The  $\chi'$  data at 10 Hz were used in the analysis in Fig. S5.

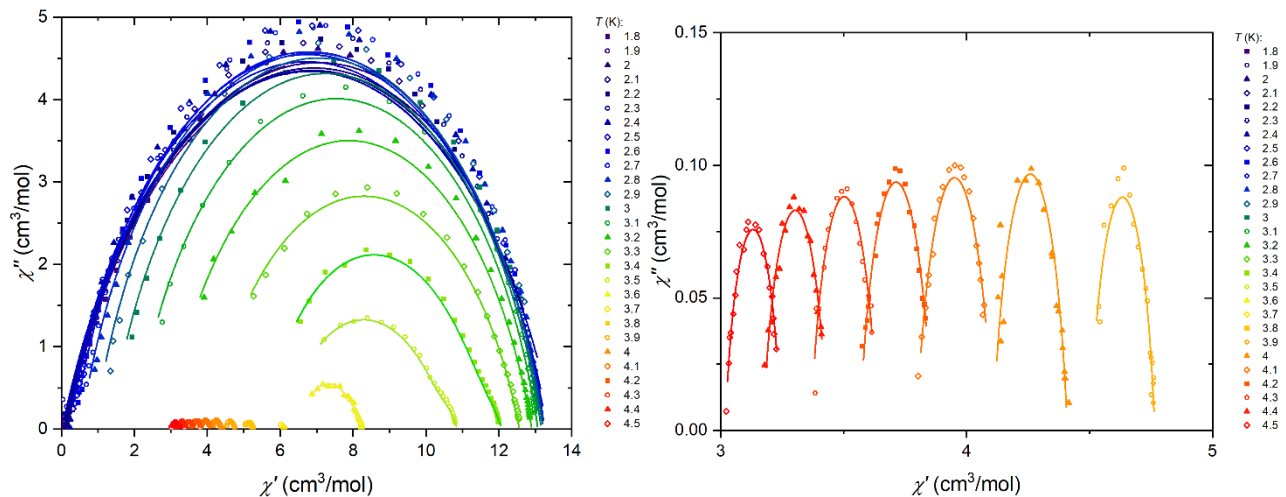

Figure S7. The Argand plots of ac magnetic susceptibility for **1-sc**, measured at  $H_{dc} = 800$  Oe,  $H_{ac} = 3$  Oe along  $\mathbf{d}_1$  and analyzed using single-mode or double-mode Cole-Cole model. Left: all curves, right: enlarged curves for the highest temperatures.

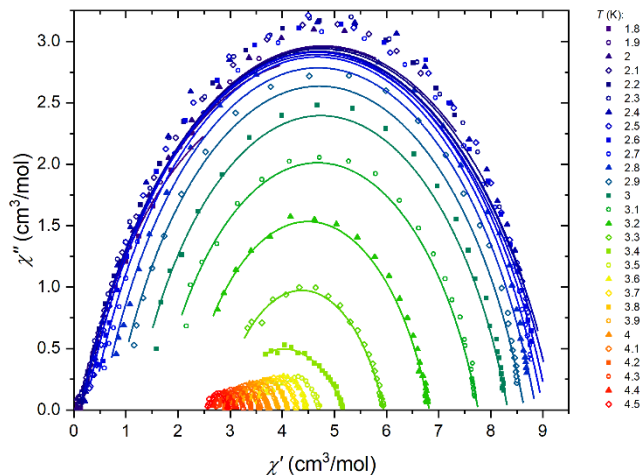

Figure S8. The Argand plots of ac magnetic susceptibility for **1-sc**, measured at  $H_{dc} = 1100$  Oe,  $H_{ac} = 3$  Oe along  $\mathbf{d}_1$  and analyzed using single-mode or double-mode Cole-Cole model.

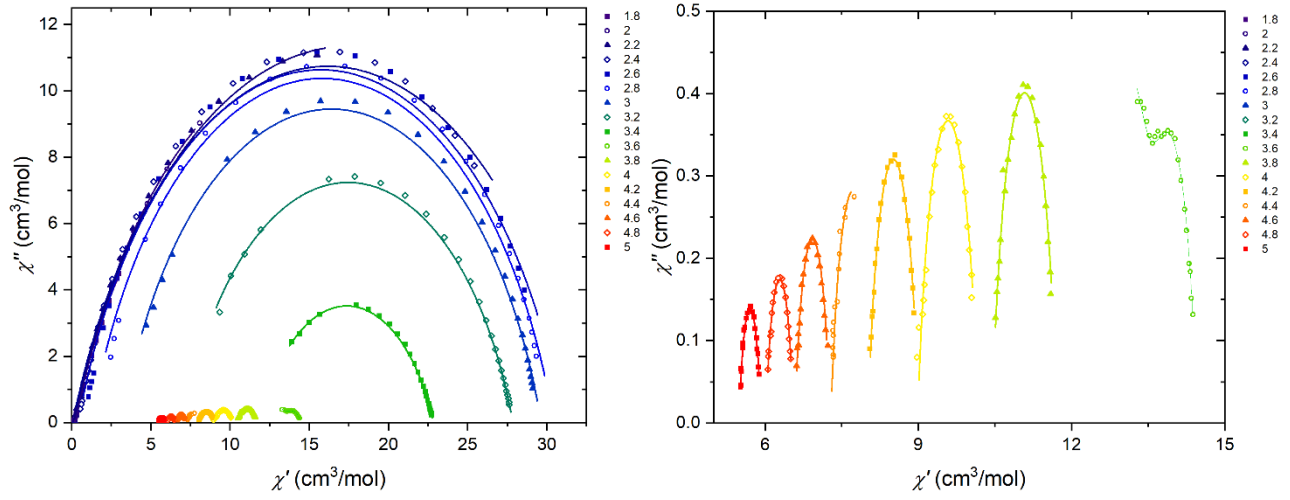

Figure S9. The Argand plots of ac magnetic susceptibility for **1-sc**, measured at  $H_{dc} = 600$  Oe,  $H_{ac} = 3$  Oe along  $d_1$  and analyzed using single-mode or double-mode Cole-Cole model. Left: all curves, right: enlarged curves for the highest temperatures.

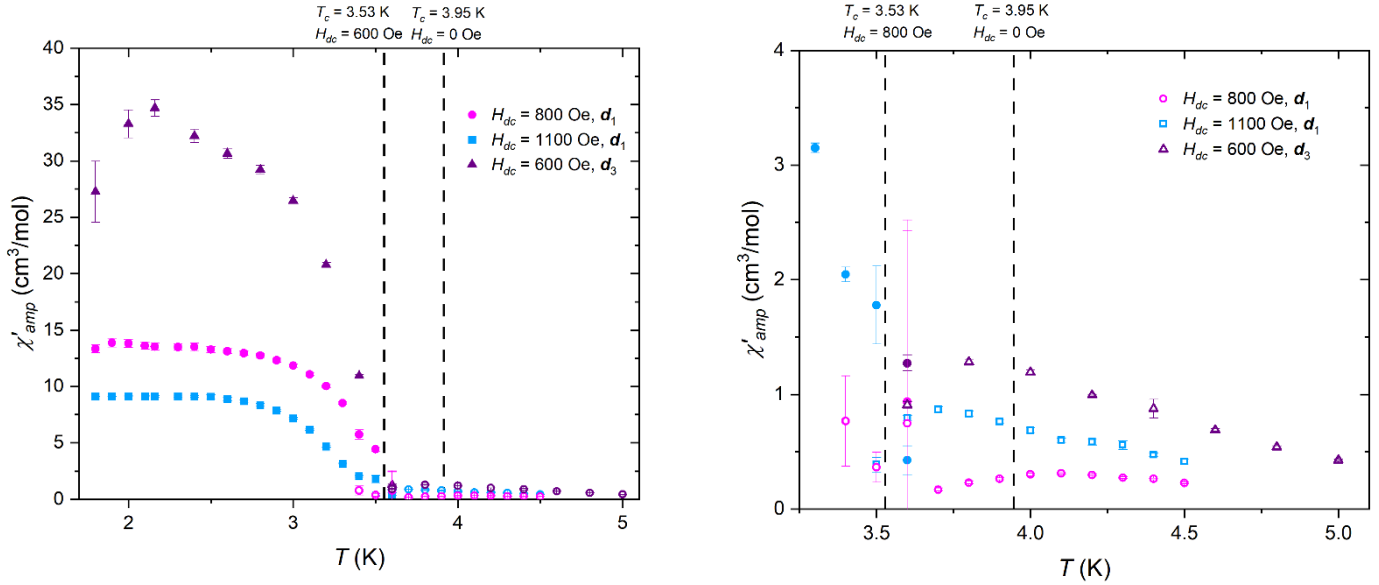

Figure S10. The temperature dependence of amplitudes determined from Cole-Cole model for all 3 measurements. Left: all temperatures. Right: Enlargement of the high-temperature region.

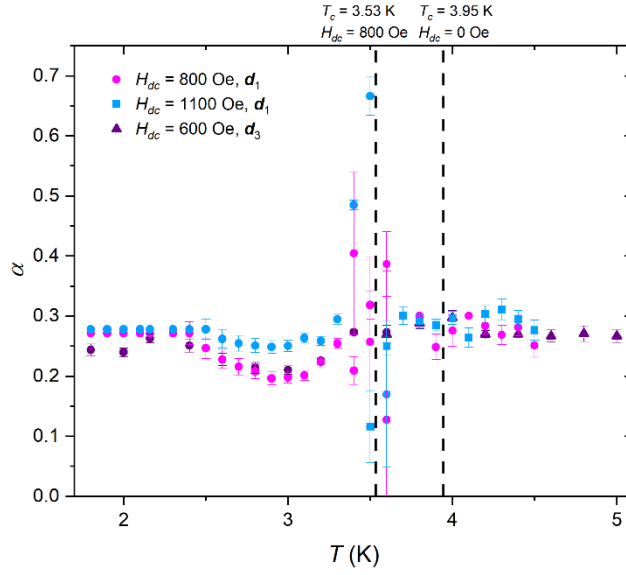

Figure S11. The  $\alpha$  parameters determined from Cole-Cole model for all 3 measurements. The values at the lowest temperatures for measurements along  $\mathbf{d}_1$  were fixed.

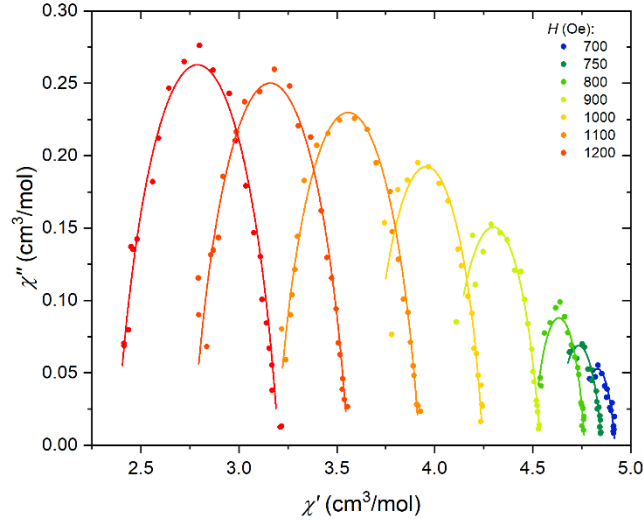

Figure S12. The Argand plot of the ac magnetic susceptibility for **1-sc**, measured at  $T = 3.9$  K,  $H_{ac} = 3$  Oe along  $\mathbf{d}_1$  and analyzed using single-mode Cole-Cole model.

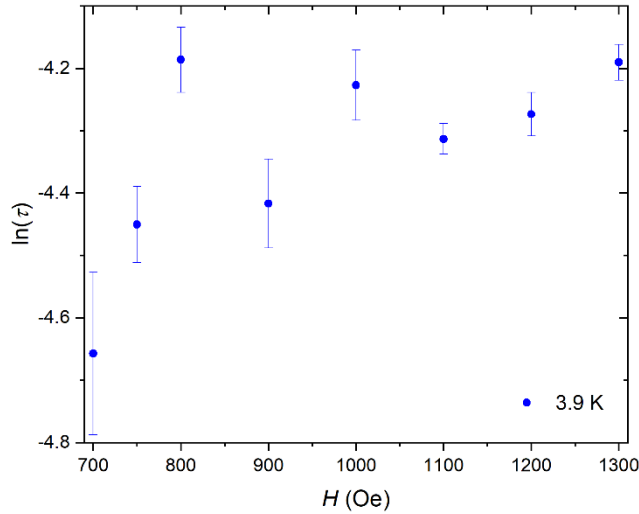

Figure S13. Field dependence of the relaxation time for a single crystal determined from fitting the Cole-Cole model for the measurement along  $\mathbf{d}_1$  at 3.9 K.

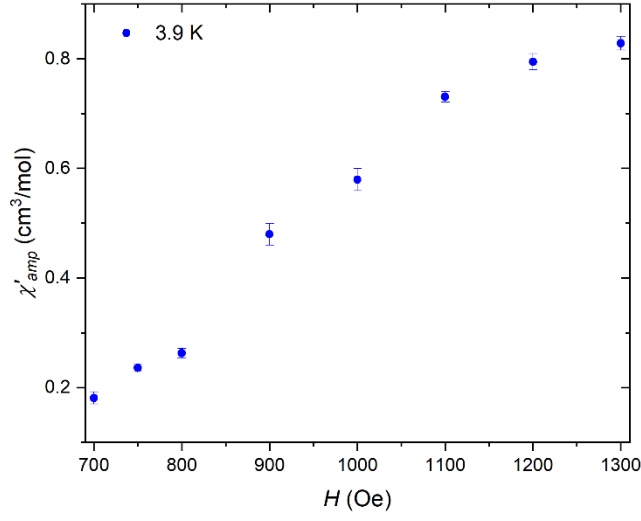

Figure S14. The field dependence of amplitudes determined from fitting the Cole-Cole model for the measurement along  $\mathbf{d}_1$  at 3.9 K.

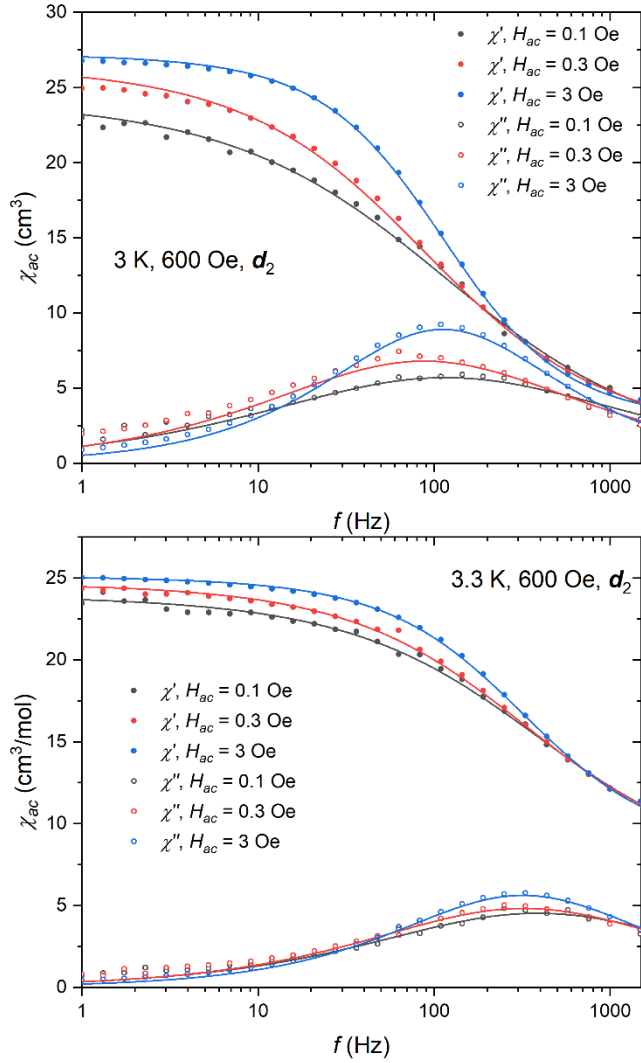

Figure S15. The ac magnetic susceptibility for **1-sc**, measured at  $T = 3.0$  (top) and 3.3 K (bottom),  $H_{ac} = 3$  Oe,  $H_{dc} = 600$  Oe, along  $\mathbf{d}_2$  direction and analyzed using the single-mode Cole-Cole model. No significant change of the position of the peak in  $\chi''$  is observed, which excludes the presence of the phonon bottleneck effect.

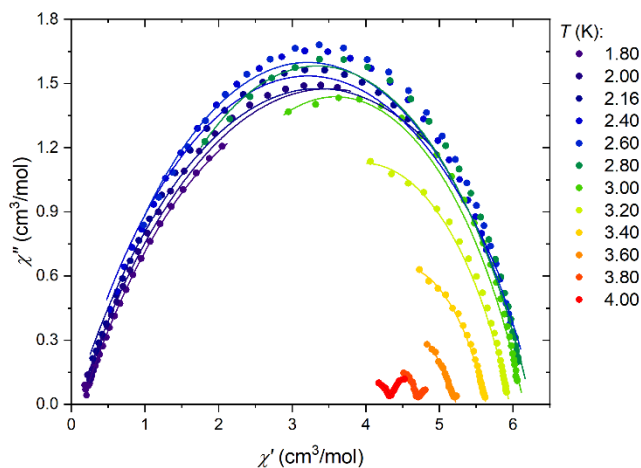

Figure S16. The Argand plot of the ac magnetic susceptibility measured at  $H_{dc} = 800$  Oe,  $H_{ac} = 3$  Oe for a powder sample **1-g1** and analyzed using single-mode Cole-Cole model.

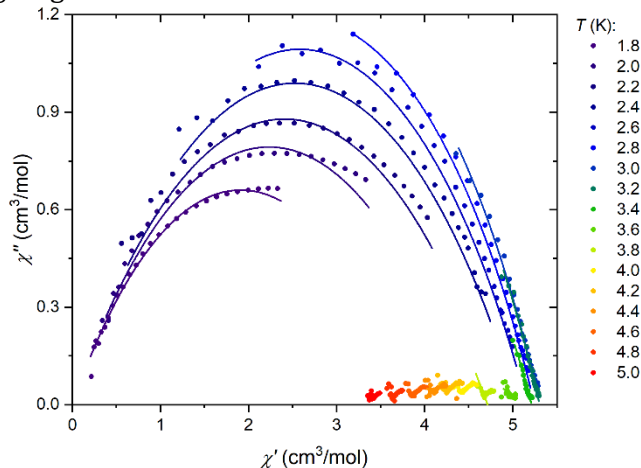

Figure S17. The Argand plot of the ac magnetic susceptibility measured at  $H_{dc} = 800$  Oe,  $H_{ac} = 3$  Oe for a powder sample **1-g2** and analyzed using single-mode Cole-Cole model.

## Specific Heat Measurements

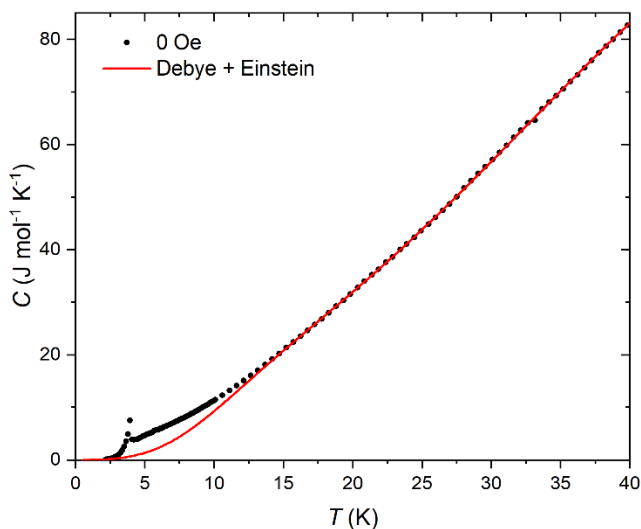

Figure S18. Temperature dependence of the specific heat of **1-sc** with the fit of a linear combination of Debye and Einstein model. The fit was performed for data in the range 20 – 40 K. Debye and Einstein temperatures are:  $\theta_D =$

72.4 (4.4) K,  $\theta_E = 164.9$  (5.1) K, the dimensionless amplitudes are:  $a_D = 2.11(16)$ ,  $a_E = 5.38(7)$ . The parameters are in agreement with the values obtained for a powder sample:  $a_E=4.16(6)$ ,  $a_D=1.84(2)$ ,  $\theta_D = 72.3(3)$  (4.4) K,  $\theta_E = 150.3(2)$  K.<sup>1</sup>

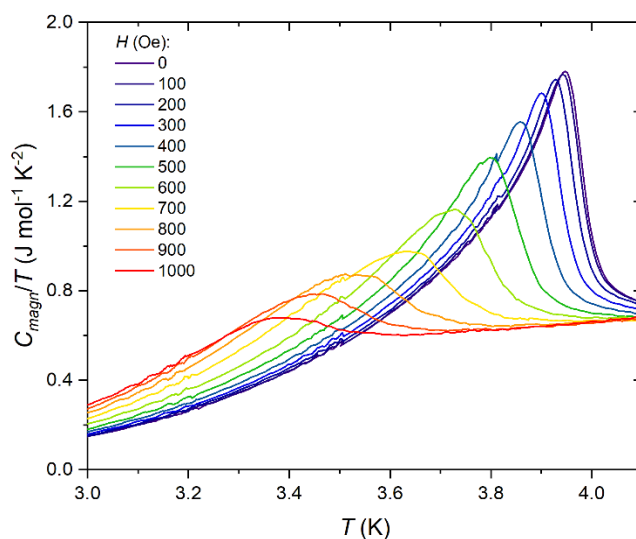

Figure S19. Temperature dependence of the magnetic contribution of specific heat for **1-sc**,  $C_{magn}$ , presented as  $C_{magn}/T$ , measured at different fields.

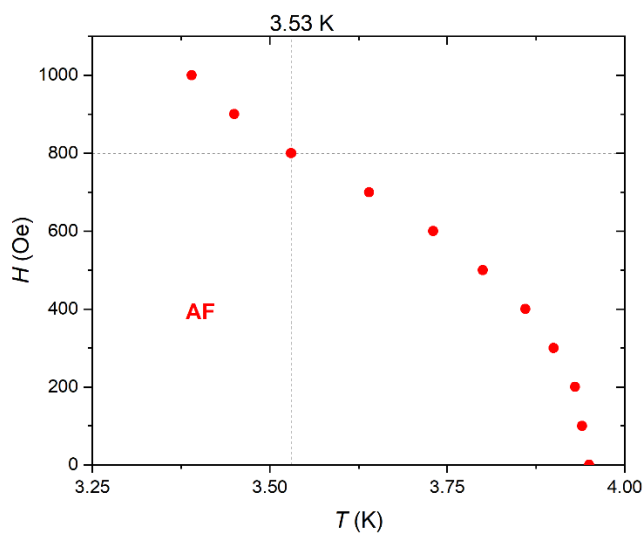

Figure S20. Magnetic phase diagram for **1-sc**. The points were determined as the  $C_{magn}/T(T)$  maxima.

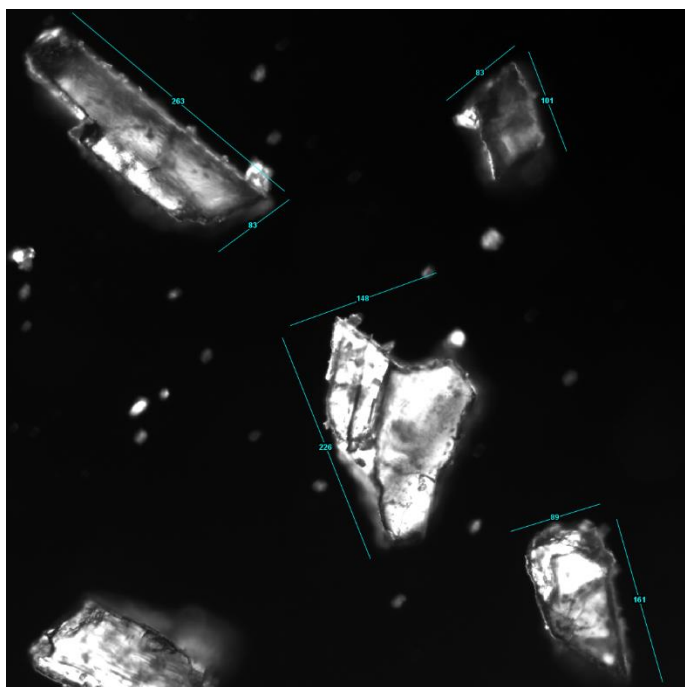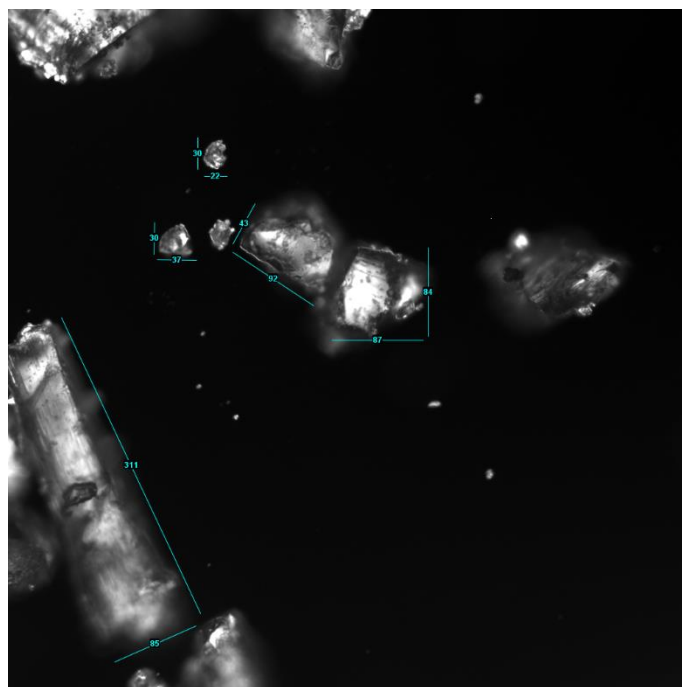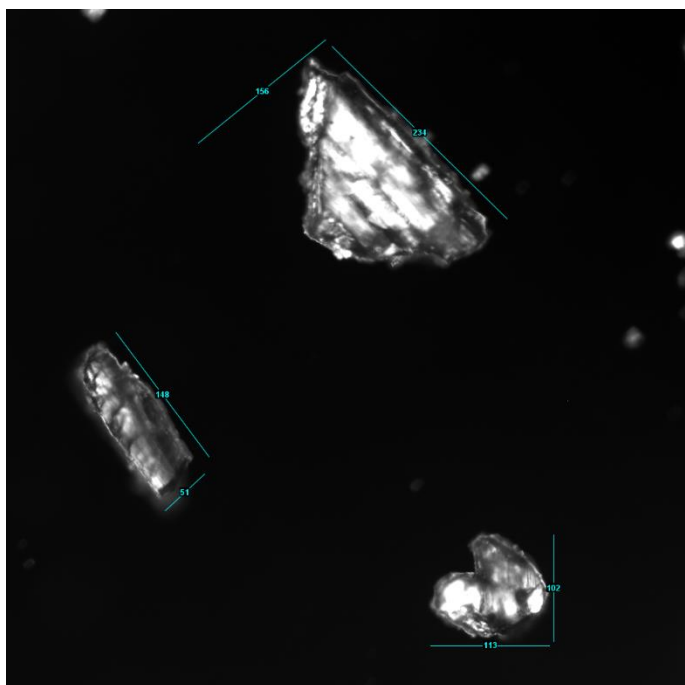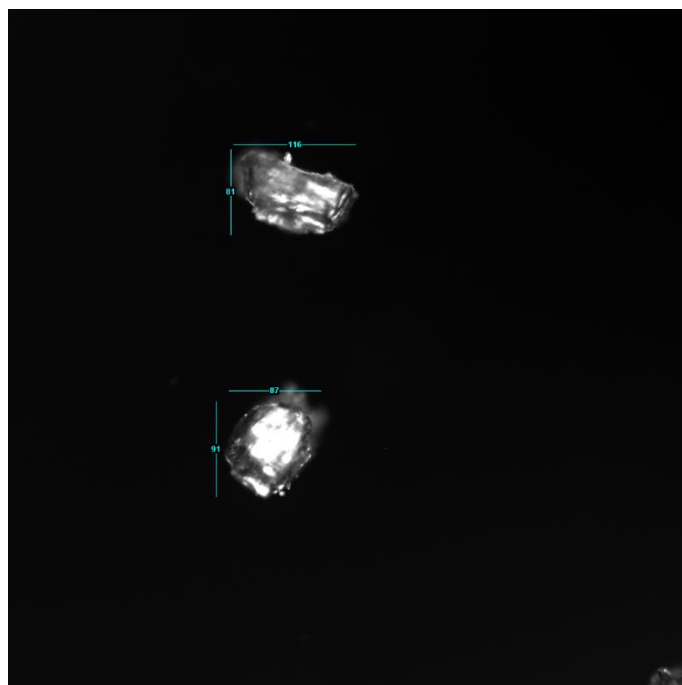

Fig. S21. The photo of crystallites in **1-g1** sample. Size of the photos:  $648\ \mu\text{m} \times 648\ \mu\text{m}$ . The blue lines are the measured distances, the blue numbers are their lengths in  $\mu\text{m}$ .

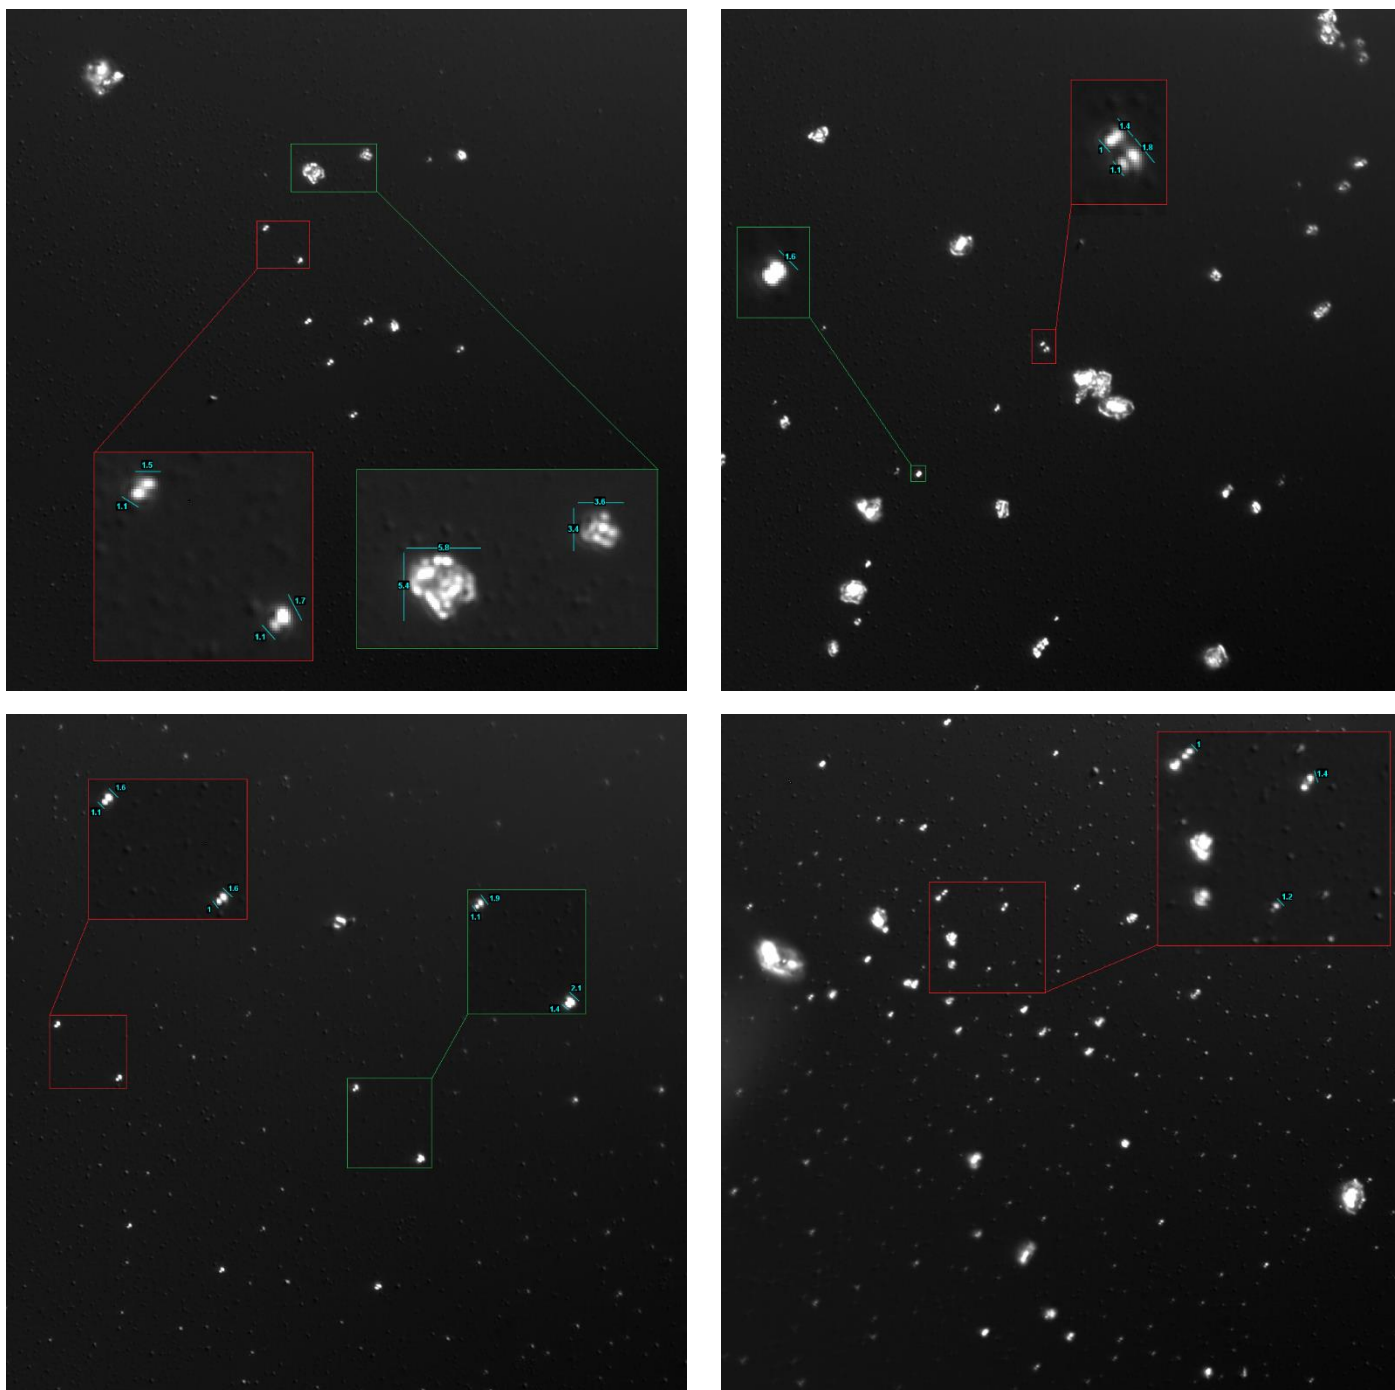

Fig. S22. The photo of crystallites in **1-g2** sample. Size of the photos:  $161\ \mu\text{m} \times 161\ \mu\text{m}$ . The blue lines are the measured distances, the blue numbers are their lengths in  $\mu\text{m}$ . With the smaller frames, there are marked the areas which are enlarged in larger frames.

### **References:**

1. M. Rams, A. Jochim, M. Böhme, T. Lohmiller, M. Ceglarska, M. Rams, A. Schnegg, W. Plass and C. Näther, *Chemistry-a European Journal*, 2020, **26**, 2765-2765.
2. M. E. Fisher, *J Math Phys*, 1963, **4**, 124-135.
3. R. L. Carlin, *Magnetochemistry*, Springer-Verlag Berlin Heidelberg, 1986.
